1 **Associations between RetNet gene polymorphisms**  
2 **and efficacy of orthokeratology for myopia control :**  
3 **sample from a clinical retrospective study**

4 Ruijing Xia, MS<sup>1#</sup> Xiangyi Yu, MS<sup>2#</sup> Lulu Peng<sup>1</sup>, MS Zhenlin Du, PhD<sup>2</sup> Xiaoguang  
5 Yu, PhD<sup>2</sup> Shilai Xing, PhD<sup>2\*</sup> Fan Lu MD, PhD<sup>1\*</sup> Xinjie Mao MD, PhD<sup>1\*</sup>

6 <sup>1</sup> School of Ophthalmology and Optometry, Wenzhou Medical University, Wenzhou,  
7 Zhejiang 325000, China

8 <sup>2</sup>Institute of PSI Genomics Co., Ltd., Shanghai, China

9

10 **Corresponding author:** Xinjie Mao, National Clinical Research Center for Ocular  
11 Diseases, Eye Hospital, Wenzhou Medical University, Wenzhou, 325027, China.

12 Telephone: +86 13705880472; Email: mxj@mail.eye.ac.cn;

13 Fan Lu, National Clinical Research Center for Ocular Diseases, Eye Hospital,  
14 Wenzhou Medical University, Wenzhou, 325027, China. Telephone: +86

15 13806882223; Email: lufan62@eye.ac.cn;

16 Shilai Xing, Institute of PSI Genomics Co., Ltd., Shanghai, China,  
17 xingshilai@psi-gene.com

18 # These authors contributed equally to this work.

19

20

**NOTE: This preprint reports new research that has not been certified by peer review and should not be used to guide clinical practice.**

## 21 **Background**

22 To study how clinical and genetic factors control the effectiveness of  
23 orthokeratology lenses in myopia.

## 24 **Methods**

25 In this study, we conducted a retrospective clinical study of 545 children  
26 aged 8–12 years with myopia who were wearing orthokeratology lenses  
27 for one year and performed whole-genome sequencing (WGS) for 60  
28 participants in two groups, one with rapid axial length progression of  
29 larger than 0.33 mm and the other with slow axial length progression of  
30 less than 0.09 mm. Genes in the RetNet database were used to screen  
31 candidate genes that may contribute to the effectiveness of  
32 orthokeratology lenses in controlling myopia.

## 33 **Results**

34 We found that children with a greater baseline eye axial length, greater  
35 spherical equivalent (SE) and greater age had better myopia control with  
36 orthokeratology. We observed a significant excess of nonsynonymous  
37 variants among those with slow myopia progression, which were  
38 prominently enriched in retinal disease related genes. We subsequently  
39 identified *RIMS2* (OR=0.01,  $p=0.0075$ ) and *LCA5* (OR=6.96,  $p=0.0080$ )  
40 harboring an excess number of nonsynonymous variants in patients with

41 slow progression of high myopia. Two intronic common variants  
42 rs36006402 in *SLC7A14* and rs2285814 in *CLUAP1* were strongly  
43 associated with axial length growth. Together, our finding identified  
44 novel genes associated with the effectiveness of orthokeratology lenses  
45 therapy in myopic children and provide insight into the genetic  
46 mechanism of orthokeratology treatment.

## 47 **Conclusion**

48 The effectiveness of orthokeratology lenses treatment involved  
49 interindividual variability in controlling axial length growth in myopic  
50 eyes. The efficacy increased when patients carried more nonsynonymous  
51 variants in retinal disease-related gene sets. Our data will serve as a  
52 well-founded reference for genetic counseling and better management of  
53 patients who choose orthokeratology lenses to control myopia.

54

55

56

57

58

59

60

61

## 62 **Abbreviations**

- 63 1. Whole-genome Sequencing(WGS)
- 64 2. Spherical equivalent(SE)
- 65 3. Odds ratio(OR)
- 66 4. Axial length(AL)
- 67 5. Single-nucleotide polymorphisms (SNPs)
- 68 6. Allele frequency (AF)
- 69 7. Minor allele frequency (MAF)
- 70 8. Genotype quality (GQ)
- 71 9. Depth(DP)
- 72 10. Principal (PC)
- 73 11. Variant Effect Predictor (VEP)
- 74 12. Burrows-Wheeler Aligner (BWA)
- 75 13. Protein-truncating variants (PTVs)
- 76 14. Combined Annotation Dependent Depletion (CADD)
- 77 15. SNP-Set (Sequence) Kernel Association Test (SKAT)
- 78 16. Generalized linear model (GLM)
- 79 17. Single-cell RNA-seq (scRNA-seq)
- 80 18. China Beijing(CHB)
- 81 19. China South(CHS)
- 82 20. China Dai(CDX)
- 83 21. Japan(JPT)

- 84 22. Korean (KHV)
- 85 23. 1000 Genome Project (1KG)
- 86 24. Genomic variant call format (GVCF)
- 87 25. Diopters (D)
- 88 26. Oculus Dexter(OD)
- 89 27. Oculus Sinister(OS)
- 90
- 91
- 92
- 93
- 94
- 95
- 96
- 97
- 98
- 99
- 100
- 101
- 102
- 103
- 104
- 105

## 106 **Background**

107 Refractive error, which accounts for the largest percentage of visual  
108 impairments, is a loss of vision due to a change in the shape of the eye  
109 that prevents light from being accurately refracted and focused on the  
110 retina. Owing to its increasing prevalence, myopia has become a global  
111 public health problem. Globally, 10% to 30% of adults suffer from  
112 myopia, and in Western populations of the United States and Europe, the  
113 prevalence of myopia is approximately 40% to 50% in young adults, with  
114 an even higher probability of 80% to 90% in some countries in East and  
115 Southeast Asia<sup>[1][2][3][4][5][6][7][8]</sup>. Myopia is also strongly associated with a  
116 number of ocular diseases, such as cataract, glaucoma, and myopic  
117 macular degeneration<sup>[9]</sup>.

118 Myopia can usually be corrected by spectacles, contact lenses or  
119 refractive surgery to provide good vision. There are many ways to control  
120 the progression of myopia<sup>[10]</sup>. Atropine eye drops, orthokeratology, and  
121 peripheral defocus modifying contact lenses or spectacles are more  
122 effective at controlling axial length elongation<sup>[11]</sup>. Orthokeratology lenses  
123 focuses light in front of the peripheral retina primarily by changing the  
124 curvature of the cornea which returns to its original way, thereby  
125 refocusing the image centrally at the fovea<sup>[12]</sup>. This causes the image  
126 contour to focus on the fovea in the center and the macula in the  
127 periphery, resulting in myopic defocus, which slows the progression of

128 myopia.

129 However, there are strong individual differences in the control effects of  
130 orthokeratology lenses. Some have fairly good control, while some have  
131 very limited or even accelerated control<sup>[13][14][15][16]</sup>. In several studies, the  
132 baseline corneal stiffness, lower baseline myopia, younger initial age and  
133 higher parental myopia have been identified as factors influencing the  
134 effectiveness of orthokeratology lenses control<sup>[17] [18]</sup>. Although many risk  
135 factors for the efficacy of orthokeratology lenses for myopia control have  
136 been revealed, the genetic factors underlying orthokeratology lenses  
137 treatment are still unknown.

138 This study aimed to explore the genetic characteristics of 289 retinal  
139 disease-related genes from the Retinal Information Network database  
140 (RetNet, <https://retnet.org/>) and clinical features in a cohort of  
141 orthokeratology lenses users. We also investigated whether these genes  
142 and specific SNPs are associated with the effectiveness of  
143 orthokeratology lenses treatment. Through this research, we hope to  
144 uncover potential relationships between genes related to retinal function  
145 and the effectiveness of orthokeratology lenses treatment, thereby  
146 enhancing our understanding of the genetic background of myopia  
147 treatment and providing new insights for developing personalized vision  
148 correction.

149 **Methods**

150 **Subjects**

151 This 1-year study used a prospective and randomized eye crossover study  
152 design. The protocol and documentation conducted in this study  
153 received full approval from institutional ethics committee of Wenzhou  
154 Eye and Vision Hospital with approval number 2023-059-K-48-05.  
155 Written informed consent was obtained from each participant. The  
156 orthokeratology lenses used in this study included four-zoned  
157 reverse-geometry lenses (Eulcid, USA and Lucid, Korea)<sup>[19]</sup>. Each subject  
158 underwent comprehensive baseline eye examination, including slit-lamp  
159 examination, testing for spherical equivalent (SE) of refraction,  
160 uncorrected visual acuity and best-corrected visual acuity, and axial  
161 length (AL) via Zeiss IOL-Master 500. All children were treated by  
162 doctors who had worked in the field of orthokeratology lenses at the  
163 hospital for more than 10 years. The doctor ordered the best lens for the  
164 subject based on the basis of each subject's corneal topography and  
165 evaluated the fit of the evaluation of corneal fluorescein pattern analysis.  
166 A total of 1,538 myopic patients who were initially wearing  
167 orthokeratology lenses were enrolled in the study. These 1,538 samples  
168 were critically reviewed and screened, leaving 545 samples with  
169 complete data and meeting the filter criteria. Each sample contained



170 clinical phenotypic data for both eyes. The amount of AL growth in both  
171 eyes of each sample was considered as an indication of the effectiveness  
172 of orthokeratology lenses in controlling myopia. We counted the amount  
173 of AL growth per year in each sample and took the anterior and posterior  
174 quartiles of AL growth as the case group (well controlled) and control  
175 group (poorly controlled, Figure 1b). In total, there were 100 cases with  
176 annualized AL growth less than or equal to 0.09mm, and 100 controls  
177 with annualized AL growth greater than or equal to 0.33mm. We  
178 randomly selected 30 cases and 30 controls for whole-genome  
179 sequencing with their written informed consent as the final analysis  
180 cohort. Figure 1a shows the entire study outline.

## 181 **Sequencing and variant calling**

182 The genomic DNA of all subjects was isolated from oral swabs via  
183 standard procedures. Whole-genome sequencing was performed using  
184 DNBSEQ-T7. Variant detection and joint genotype calling analyses were  
185 conducted based on the Sentieon DNAscope pipeline (Sentieon Inc.,  
186 version 202308)<sup>[20]</sup>. The sequence reads of each sample in FASTQ format  
187 were aligned against the human reference genome (GRCh38) using  
188 BWA-MEM<sup>[21]</sup>. The alignment file was sorted using Sentieon sort  
189 algorithm, and the Sentieon Dedup algorithm was used to mark  
190 duplicated reads. Then SNVs and indels were called in genomic variant

191 call format (GVCF) using Haplotyper. The Sentieon GVCFTyper jointly  
192 called subjects as a cohort.

## 193 **Quality control**

194 We applied standard variant-level quality controls. We excluded variants  
195 for further analysis if they had an average genotype depth (DP) < 20 and a  
196 genotype quality (GQ) < 40 . We detected population outliers and  
197 stratification using a method based on principal component analysis,  
198 which indicated that the affected individuals and control subjects were  
199 genetically matched for all sequenced samples using Plink  
200 2.0<sup>[22]</sup>(Additional File 1). PCs 1 to 10 were assessed for their associations  
201 with disease phenotype status using a generalized linear model (GLM)  
202 and then included in the GWAS as covariates. A population check was  
203 conducted on east Asian populations including CHB (China Beijing),  
204 CHS (China South), CDX (China Dai), JPT (Japan) and KHV (Korean)  
205 individuals from the 1000 Genome Project (1KG)<sup>[23]</sup>.

## 206 **Variant Annotation**

207 The annotation of variants was performed with Ensembl's Variant Effect  
208 Predictor (VEP v.0.1.16) <sup>[24]</sup>for the human genome assembly GRCh38.  
209 We used population allele frequency (AF) data from the following  
210 databases: 1000 Genomes, ESP and Genome Aggregation Database

211 (gnomAD)<sup>[25]</sup>. We employed multiple in silico prediction algorithms,  
212 including PolyPhen-2<sup>[26]</sup>, SIFT<sup>[27]</sup>, Combined Annotation Dependent  
213 Depletion (CADD)<sup>[28]</sup>, LOFTEE and SpliceAI<sup>[29]</sup> plugins to generate  
214 additional bioinformatic predictions of variant deleteriousness.  
215 Protein-coding variants were annotated into the following three classes:  
216 (1) synonymous; (2) nonsynonymous (3) noncoding. In detail,  
217 nonsynonymous variants were classified as PTV variants and missense  
218 variants including following annotation terms:(1)PTV:"frameshift\_variant",  
219 "splice\_acceptor\_variant", "splice\_donor\_variant", "stop\_gained",  
220 "start\_lost", "stop\_lost", protein\_altering\_variant or SpliceAI > 0.5 &  
221 LoF=HC. (2) Missense: inframe\_insertion, "inframe\_deletion",  
222 "missense\_variant". The synonymous variants was predicted as  
223 "synonymous\_variant". Finally, non-coding was classified as  
224 "intron\_variant","intergenic\_variant",  
225 "downstream\_gene\_variant","3\_prime\_UTR\_variant",  
226 "5\_prime\_UTR\_variant","mature\_miRNA\_variant","regulatory\_region\_v  
227 ariant","non\_coding\_transcript\_exon\_variant" and  
228 "upstream\_gene\_variant".

## 229 **Gene-set burden analysis**

230 To estimate the extent to which variants with different allele frequencies  
231 and different functions are over-represented in individuals with different

232 control effects, we conducted burden tests across the entire genome and  
233 289 RetNet genes<sup>[30]</sup>. Common and rare variants were differentiated  
234 according to allele frequency from ChinaMap<sup>[31]</sup>, with minor allele  
235 frequency (MAF) less than 0.05 as rare variants and vice versa for  
236 common variants. For RetNet genes, we performed a logistic test by  
237 regressing the case-control status on certain classes of variants aggregated  
238 across target gene set in an individual and adjusting for sex, the baseline  
239 AL, the top ten PCs, and the genome-wide variant count.

#### 240 **Gene-based collapsing analysis**

241 For the gene-based test, we restricted our testing to common variants  
242 annotated as nonsynonymous. To assess whether a specific gene exhibited  
243 an over-representation or under-representation of common  
244 nonsynonymous cases, we performed five gene-level association tests,  
245 including Fisher's exact test, logistic, SKAT<sup>[32]</sup>, SKAT-O<sup>[33]</sup> and  
246 Magma<sup>[34]</sup>, with previously defined covariates (sample sex, PC1-PC10).

#### 247 **Cell type enrichment**

248 We acquired a single-cell RNA-seq (scRNA-seq) expression matrix and  
249 metadata of developing human embryonic eyes from the Broad Institute  
250 Single Cell Portal (<https://singlecell.broadinstitute.org/>, SCP1311) and  
251 performed a scRNA-seq analysis in R4.3.2.

#### 252 **Single-variant association analysis**

253 We estimated associations of common variants ( $MAF > 0.05$ ) by using  
254 Saige<sup>[35]</sup>, fastGWAS<sup>[36]</sup>, PLINK, MLMA-LOCO <sup>[37]</sup>and EMMAX<sup>[38]</sup> tests  
255 and corrected for the first ten PCs.

## 256 **Statistical analysis**

257 Statistical analyses were performed using R4.3.2. The differences in  
258 phenotype and sequencing quality between groups were compared by  
259 Student's t-test. These phenotypes were also evaluated for  
260 phenotype-genotype correlation by Wilcoxon rank sum test. Statistical  
261 significance was defined as a  $P$ -value less than 0.01. \*  $P < 0.05$ , \* \*  $P$   
262  $< 0.01$ , \* \* \*  $P < 0.001$ .

263

264

265

266

267

268

269

270

271

272

273

## 274 **Results**

### 275 **Subject Demographics**

276 After a rigorous data review, 545 of 1538 patients were considered  
277 complete and compliant. At baseline, their age ranged from 8 to 12  
278 years( $10.12 \pm 1.27$ ), their SE refractive errors ranged from -1 to -6 (OD:  
279  $-3.11 \pm 1.08$ ; OS:  $-3.08 \pm 1.09$ ) diopters (D), and their AL ranged from  
280 22.96 to 27.94 (OD:  $24.85 \pm 0.80$ ; OS:  $24.83 \pm 0.80$ )mm. The  
281 orthokeratology lenses used in this study has no difference in the amount  
282 of annualized AL growth(Eulcid, USA and Lucid, Korea.  $P=0.66$ ,  
283 Wilcoxon rank sum test). A total of 100 cases and 100 controls were  
284 selected on the basis of quartiles of annualized AL growth (Methods), and  
285 accordingly 30 cases and 30 controls were randomly selected for  
286 sequencing and genetic analysis.

### 287 **Clinical influences on the effectiveness of OK lens control**

288 After screening 545 samples of acceptable quality, we focused on the  
289 correlation between the baseline phenotype (age,SE,AL) and annualized  
290 AL growth in these samples. We found that all three phenotypes  
291 correlated with the AL growth in both eyes (Figure 2). The older samples  
292 had smaller AL growth (OD:  $\text{cor} = -0.26$ ,  $p = 1.3\text{e-}09$ ; OS:  $\text{cor} = -0.23$ ,  $p$   
293  $= 3.5\text{e-}08$ ). Similarly, the same negative correlation was found in the

294 statistics for baseline AL (OD:  $\text{cor} = -0.2$  ,  $p = 1.9\text{e-}06$ ; OS:  $\text{cor} = -0.24$  ,  
295  $p = 1.3\text{e-}08$ ) and SE (OD:  $\text{cor} = -0.24$  ,  $p = 1.9\text{e-}08$ ; OS:  $\text{cor} = -0.29$  ,  $p =$   
296  $7.6\text{e-}12$ ).

297 Furthermore, we analyzed the baseline phenotypes of 30 samples with  
298 well controlled AL growth and 30 samples with poorly controlled AL  
299 growth. Significant differences in the amount of AL growth were found  
300 between the two groups (OD:  $p=2.11\text{e-}24$ ; OS:  $p=2.29\text{e-}46$ . Figure 3a).  
301 There were no significant differences in age distribution or SE between  
302 two eyes (Figure 3b,c). In contrast, a significant difference in baseline AL  
303 was found between the two groups (OD:  $p=0.00313$ ; OS:  $p=0.00608$ .  
304 Figure 3d).

305 The effects of different baseline phenotypes on orthokeratology lenses in  
306 myopia control were subsequently tested by using a logistic regression  
307 model (Figure 3e). We identified a significant enrichment of baseline AL  
308 among cases with a positive effect compared with controls (OD:  
309  $\text{OR}=3.17$ ,  $p=0.00679$ ).

## 310 **Whole-genome sequencing of 60 samples**

311 After stringent quality control, we used WGS data from 30 cases and 30  
312 controls in the discovery stage. A total of 7,644,581 biallelic variants were  
313 used for further analysis, including 3,233,468 common variants and  
314 3,254,265 rare variants divided by ChinaMap. Sequencing quality was

315 not significantly different between the cases and controls (Additional File  
316 1). These remaining samples were all ancestry-matched, closely  
317 resembling CHB and CHS ancestry in the 1000G genome.

### 318 **Excesses of gene-set based nonsynonymous variants**

319 To aggregate multiple alleles of presumed similar impact in retina  
320 disease-associated genes, we adopted a complementary strategy, focusing  
321 on variants in different functional regions, and sought to improve the  
322 ability to detect variant associations by exploiting the more robust  
323 functional annotation of coding variation. We first evaluated the  
324 associations among the burden of all variants, common variants and rare  
325 variants by a Firth-logistic models, and then dissected the burden test into  
326 the RetNet gene set. Specifically, the model used Firth-based logistic  
327 regression and incorporated sample sex, principal component (PC) 1-10 ,  
328 the total genome count and sample base AL. There was no significant  
329 difference in any type of variants between cases and controls when the  
330 gene-set was not restricted (Additional File 2).

331 Gene sets covering different biological processes and  
332 pre-experimental validations could refine our understanding of the  
333 mechanisms of associations between the variants and the control effects  
334 of orthokeratology lenses and help to derive potential biological  
335 hypotheses for subsequent detailed analyses. We chose the RetNet gene



336 collection to explore the associations between retina-associated biological  
337 pathway genes and orthokeratology lenses control effects. After  
338 restricting the gene set, we observed significant enrichment of  
339 nonsynonymous variants in cases (OR=1.34 ,  $p=0.00106$ , Figure 4a).

### 340 **Gene-based common variant association analysis**

341 To identify genes associated with the effect of orthokeratology lenses on  
342 myopia control, we performed an association analysis in which  
343 individuals were categorized on the basis of presence or absence of  
344 common nonsynonymous variants. The genes significantly associated  
345 with positive effects included 3 variants in *RIMS2* (OR=0.01,  $p=0.0075$ )  
346 and *LCA5* (OR=6.96,  $p=0.0080$ ; Figure 3a, b, Table 1). Cell-type  
347 specificity analysis of data from whole eyes consistently revealed that  
348 *RIMS2* was mainly expressed in retina and that *LCA5* was expressed at  
349 low levels in various eye tissues (Figure 5c, d, e). Furthermore, when the  
350 tissue was restricted as retina, both genes presented the strongest  
351 expression in rod cells (Figure 5f, g).

### 352 **Single-variant association analyses in RetNet genes**

353 We examined all common variants of RetNet genes that passed standard  
354 quality control for associations test, utilizing a generalized mixed-based  
355 method (SAIGE) capable of accommodating population structure, a

356 sparse genetic relationship matrix and relatedness. The discovery analysis  
357 identified variants that reached the significance level including 16 SNPs  
358 (Table 2).

359 We further explored the relationships between these 16 variants and the  
360 axis growth. We found that, compared to those with the wild type,  
361 homozygous carriers of rs36006402 have a lower AL growth( $p=0.005$ ).  
362 Greater axial growth was found in both homozygous ( $p=0.0084$ ) and  
363 heterozygous ( $p=0.0096$ ) carriers of rs2285814 (Figure 6).

364

365

366

367

368

369

370

371

372

373

374

375

376

377

## 378 **Discussion**

379 In the present study, we compiled one of the largest orthokeratology  
380 lenses cohorts genotyped via whole-genome sequencing. With this  
381 comprehensive dataset, we explored not only the clinical factors that  
382 influence the effectiveness of orthokeratology lenses in controlling  
383 myopia through the annual increase in AL, but also the genetic landscape  
384 and underlying biological mechanisms of the efficiency of  
385 orthokeratology.

386 Through rigorous and comprehensive data screening, 545 samples were  
387 retained out of a amount of 1583 samples. The baseline data revealed a  
388 significant negative correlation between age, initial myopia progress and  
389 the amount of ocular AL growth. Younger individuals with lower baseline  
390 AL and SE experienced greater AL growth.

391 Age has been found to be negatively correlated with AL growth after  
392 wearing orthokeratology lenses in previous studies<sup>[8][17][39][40][41][42]</sup>. This  
393 may be because that the eye axis naturally decreases with age within the  
394 children population<sup>[43][44][45]</sup>. There is a relatively high risk of progression  
395 to high myopia among children with early school-age myopia onset<sup>[46]</sup>.

396 Moreover, younger myopic patients harbor more variants in genes that  
397 affect vision<sup>[47][48][49]</sup>. These findings indicated the influence of genetic  
398 factors on the progression of myopia. Several studies have also reported

399 an association between higher baseline SE and lower amounts of ocular  
400 axis growth<sup>[50][51][18][15]</sup>. Similarly, the conclusion that a longer baseline AL  
401 can retard axial growth while wearing orthokeratology lenses has been  
402 confirmed by multiple studies<sup>[52][53]</sup>. A natural slowing of AL growth may  
403 occur once the eye approaches a specific threshold for myopia and AL.  
404 These findings also suggest that the use of orthokeratology lenses in older  
405 children with greater degrees of myopia may be more effective in slowing  
406 the progression of AL growth. On the other hand, for younger children  
407 with lower degrees of myopia, a combination of treatment methods, such  
408 as low-concentration 0.01% atropine<sup>[54][55] [56]</sup>, may be needed for optimal  
409 results as previous research has shown that combined use is effective in  
410 younger children<sup>[45]</sup>.

411 Through the quartile division, we identified 100 patients whose annual  
412 AL growth was less than 0.09 and 100 patients with annual AL growth  
413 more than 0.33. This situation specifies that there is a large difference in  
414 the degree of acceptance of OK lenses by each individual. We further  
415 selected 30 cases from each group for whole-genome sequencing. There  
416 was a very significant difference in the amount of AL growth between the  
417 two groups. Differences in the baseline AL were found between the two  
418 groups. Additionally, baseline AL was also considered a factor that  
419 promoted the efficacy of orthokeratology lenses according to the logistic  
420 regression analysis. This conclusion further validates the findings from

421 the correlation analysis mentioned before that a more severe initial state  
422 of myopia might be a potential factor for achieving better outcomes with  
423 the subsequent use of orthokeratology lenses. These findings suggest that  
424 the baseline AL can be used as a factor for assessing and predicting the  
425 effectiveness of myopia control in patients.

426 Subsequently, we explored the genetic characteristics of the samples that  
427 influence the effectiveness of orthokeratology lenses at the genetic level  
428 by a whole-genome sequencing. Gene-set burden analysis of the RetNet  
429 gene set revealed that common nonsynonymous variants promote the  
430 effectiveness of orthokeratology. Hyperopic shift occurs in central retina  
431 and myopic defocus in the peripheral retina after overnight  
432 orthokeratology<sup>[14][57][58]</sup> which suggests an inextricable role for retinal  
433 photoreceptor mechanisms in orthokeratology lenses wear. Visual signals  
434 from the peripheral retina have a strong influence on eye growth<sup>[59][60]</sup>,  
435 and biological processes mediated by genetic variants in the RetNet gene  
436 set may affect the defocusing effect of orthokeratology<sup>[61]</sup>, thereby  
437 enhancing or preventing the inhibitory effect on AL growth produced by  
438 wearing orthokeratology. In addition, mutations in genes in RetNet have  
439 been implicated as part of the evidence for early-onset high  
440 myopia<sup>[62][63][64]</sup>. The myopic pathway caused by variants in the RetNet  
441 gene may also lead to more pathologically early-onset myopia than those

442 in late-onset<sup>[62]</sup> myopia, such that younger patients have even higher  
443 annualized AL growth.

444 Further after that, we found that two genes were associated with  
445 orthokeratology lenses control. *RIMS2* plays a negative role in the control  
446 effect of orthokeratology. *RIMS2* has the highest expression in the retina  
447 among all ocular tissues. The maximum expression was detected in rod  
448 cells in the retina. In contrast, nonsynonymous variants of *LCA5*  
449 facilitated the validity of orthokeratology. The expression of *LCA5* was  
450 the same highest in the Rod cells. *RIMS2* is the primary large *RIM*  
451 isoform found at photoreceptor ribbon synapses, and is crucial for  
452 maintaining normal synaptic connections. Mutations in *RIMS2* may result  
453 in post-photoreceptor defects affecting both the cone and rod signaling  
454 pathways<sup>[65]</sup>,foveal changes and inner retinal thinning<sup>[66]</sup>. In this study,  
455 *RIMS2* may influence the effectiveness of orthokeratology lenses by  
456 affecting the hyperopic shift in the retina, potentially through its role in  
457 synaptic neurotransmitter transmission in Rod cells. The *LCA5* gene is  
458 associated with Leber congenital amaurosis (LCA), a hereditary retinal  
459 disease that severely affects vision. Mutations in the *LCA5* gene can lead  
460 to functional impairment and structural abnormalities in the retinal  
461 photoreceptor cells<sup>[67][68][69]</sup>. However, no phenotypic differences were  
462 detected between samples harboring these two gene variants and those  
463 without. Their age, SE, and baseline AL remained consistent. This might

464 be due to the limitation of the sample size. In the future, larger-scale data  
465 is needed to explore the relationships between phenotypes and molecular  
466 characteristics at the genetic level, in order to uncover the underlying  
467 control mechanisms.

468 Subsequently, at the SNP level, association analysis revealed 16  
469 mutations located in 16 different genes related to the effectiveness of  
470 orthokeratology. These signals suggest that the effectiveness of  
471 orthokeratology lenses is linked to certain genetic characteristics. Among  
472 these 16 variants, rs36006402 and rs2285814 were found to be  
473 significantly associated with the AL growth. Individuals carrying the  
474 homozygous rs36006402 variant showed decreased AL growth compared  
475 with those with the wild-type or heterozygous variant, whereas those  
476 carrying rs2285814 in both the homozygous and heterozygous manners had  
477 increased AL growth . The rs36006402 (OR=4.8,  $p=0.0003$ ) is located in  
478 the intron area of the *SLC7A14* gene and is inherited in a recessive  
479 manner. *SLC7A14* plays an important role in retinal development and  
480 visual function<sup>[70]</sup>. The rs2285814 (OR=0.36,  $p=0.0021$ ) also occurs at an  
481 intron position in the *CLUAP1* gene. *CLUAP1* is associated with the  
482 intraflagellar transport (IFT) complex B group of proteins and undergoes  
483 IFT in both invertebrates and vertebrates, which has been associated with  
484 photoreceptor maintenance<sup>[71][72]</sup>. After all, further analysis is required to  
485 do the replication and functional validation of these associations.

486 Our study has several strengths. First, to date, no research has explored  
487 the genetic associations of the effectiveness of orthokeratology, with  
488 studies only addressing only differences in clinical information. This  
489 study employs a genome wide sequencing strategy in the Chinese  
490 population, which provides high-density coverage of noncoding regions,  
491 offering an opportunity to identify novel susceptibility loci. The unveiling  
492 of the first genetic study on orthokeratology lenses effectiveness cohort  
493 highlights a significant milestone in the field, offering a wealth of insights  
494 into the genetic underpinnings and clinical manifestations of these  
495 methods for myopia control with complex effects.

496 The limitations of this work primarily include the small sample size for  
497 GWAS analysis, which leads to insufficient statistical power and biased  
498 effect size estimation. Large-scale studies enable the confident  
499 identification of variants with small effect sizes and low allele  
500 frequencies, thereby facilitating a deeper understanding of the genetic  
501 basis of orthokeratology lenses effectiveness. Accordingly, these findings  
502 warrant replication in additional cases to further investigate the broader  
503 impact of these genes on the effectiveness of orthokeratology.

504

505

506



## 507 **Conclusion**

508 In summary, our study revealed that age, baseline AL, and baseline SE  
509 are clinical factors affecting the effectiveness of orthokeratology. We  
510 initially conducted a WGS-based association study restricted to a retinal  
511 disorder gene set in a sizable Chinese cohort, which not only enhances  
512 the efficiency of array-based genetic studies for identifying both common  
513 and low-frequency susceptibility variants but also helps depict the genetic  
514 etiology of orthokeratology lenses effectiveness. The successful pursuit of  
515 subsequent steps will refine current heuristics for the clinical  
516 decision-making of this complex treatment method.

517

518

519

520

521

522

523

524

525

526

527

## 528 **Availability of data and materials**

529 The data that support the findings of this study are available from the corresponding author  
530 upon reasonable request.

## 531 **Authors' contributions**

532 The study was conceived, designed, and supervised by Xinjie Mao. Fan Lu, Shilai Xing  
533 and Xiangyi Yu. Analysis of data was performed by Xiangyi Yu, Ruijing Xia, Zhenlin Du,  
534 Xiaoguang Yu and Lulu Peng. The manuscript was written by Xiangyi Yu and Ruijing Xia.  
535 Written informed consent for publication was obtained from all participants.

## 536 **Competing interests**

537 The authors declare no competing financial interests.

## 538 **Ethics approval and consent to participate**

539 The protocol and documentation conducted in this study received full approval from  
540 institutional ethics committee of Wenzhou Eye and Vision Hospital with approval number  
541 2023-059-K-48-05. Written informed consent was obtained from each participant.

## 542 **Acknowledgements**

543 We express our gratitude to all participants in this study.

## 544 **Consent for publication**

545 Not applicable.

## 546 **Funding**

547 Not applicable.

548

549

550

551

552

553

554 **Figure 1. Study flowchart and sample screening process.** (a). screening process for  
555 1538 study participants. (b). selecting populations with distinct control effects based  
556 on quartiles.

557 **Figure 2. Correlation between Baseline Data and annualized AL growth.** The  
558 correlation between AL growth and (a) age, (b) SE, (c) baseline AL.

559 **Figure 3. Differences in Baseline Data and Clinical Factors Affecting Control**  
560 **Effectiveness.** Difference between case and control in (a) AL growth, (b) age, (c) base  
561 SE and (d) base AL. (e) logistic regression in the effect factor of orthokeratology  
562 lenses control.

563 **Figure 4. Gene-set polygenic burden test of different type of variant.** Gene-set burden  
564 analysis in nonsynonymous, synonymous and noncoding variants with a MAF (a)  $>0.05$ , (b)  
565  $<0.05$ .

566 **Figure 5. Collapsing analysis identifies 2 genes affect the efficacy of orthokeratology.** (a),  
567 Manhattan plots of the gene-based collapsing analysis. An excess of nonsynonymous within  
568 RetNet genes were tested using Logistic regression, Red line,  $P = 0.01$ . (b), 2 genes from  
569 collapsing analyses under the same model are shown, including the exact numbers of all  
570 qualifying cases and controls and statistical calculations of association (OR and  $P$ ). tSNE of  
571 (c) all tissues single-cell data with cell colored based on the expression of (d) *RIMS2* genes  
572 and (e) *LCA5*. Gene expression levels are indicated by shades of blue. Violin plot of  
573 expression in sub celltype of retina in (f) *RIMS2* and (g) *LCA5*. Abbreviations are as follows:  
574 R: rod cells, OFF BC: OFF bipolar cells, ON BC: ON bipolar cells, R BC: Rod bipolar cells,  
575 AC: Amacrine cells, C: Cone, HC: Horizontal cells, MG: Muller glia.

576 **Figure 6. Cumulative difference of AL growth.** Differences in annual AL growth  
577 between populations carrying heterozygous, homozygous, and wild-type variants of (a)  
578 rs36006402 and (b) rs2285814.

579

580

581

582

583

584

585

586

587

588

589

590

591

592

593

594

595

**Table 1. All qualified variants in *RIMS2* and *LCA5* in 30 cases and 30 controls with ChinaMap MAF > 0.5% .**

| Chromosome   | Position  | SNP        | HGVS.c    | HGVS.p       | Variant type     | PolyPhen                 | MAF in ChinaMap | Alleles in 30 cases | Alleles in 30 controls |
|--------------|-----------|------------|-----------|--------------|------------------|--------------------------|-----------------|---------------------|------------------------|
| <i>RIMS2</i> |           |            |           |              |                  |                          |                 |                     |                        |
| chr8         | 104093618 | rs55788818 | c.3841C>T | p.Arg1281Cys | missense variant | probably_damaging(0.998) | 0.15            | 4                   | 9                      |
| <i>LCA5</i>  |           |            |           |              |                  |                          |                 |                     |                        |
| chr6         | 79487131  | rs1875845  | c.1967G>A | p.Gly656Asp  | missense variant | benign(0)                | 0.25            | 15                  | 6                      |
| chr6         | 7951881   | rs34068461 | c.77A>C   | p.Asp26Ala   | missense variant | possibly_damaging(0.808) | 0.22            | 14                  | 5                      |

**Table 2. The most significant single-variant associations for orthokeratology lenses**

**effect identified by SAIGE analysis.**

| SNP        | A1 | A2 | Beta  | SE   | OR   | P value | gene           | Variant type            |
|------------|----|----|-------|------|------|---------|----------------|-------------------------|
| rs36006402 | T  | C  | 1.69  | 0.47 | 4.82 | 0.0003  | <i>SLC7A14</i> | intron_variant          |
| rs4785329  | G  | A  | 1.41  | 0.43 | 3.52 | 0.0012  | <i>ZNF423</i>  | intron_variant          |
| rs2059479  | A  | C  | 2.02  | 0.65 | 6.20 | 0.0020  | <i>TRPM1</i>   | intron_variant          |
| rs2285814  | G  | T  | -1.28 | 0.42 | 0.36 | 0.0021  | <i>CLUAP1</i>  | intron_variant          |
| rs4655445  | G  | T  | 1.41  | 0.47 | 4.00 | 0.0028  | <i>USH2A</i>   | intron_variant          |
| rs1227067  | T  | C  | -1.57 | 0.53 | 0.22 | 0.0031  | <i>CDH23</i>   | intron_variant          |
| rs7097667  | G  | A  | 1.27  | 0.45 | 3.29 | 0.0050  | <i>PDE6C</i>   | intron_variant          |
| rs7144028  | A  | C  | -1.33 | 0.49 | 0.32 | 0.0067  | <i>TTC8</i>    | downstream_gene_variant |
| rs28713337 | G  | A  | 1.44  | 0.53 | 3.97 | 0.0067  | <i>HMX1</i>    | downstream_gene_variant |
| rs9595937  | A  | G  | -1.15 | 0.43 | 0.36 | 0.0074  | <i>RBI</i>     | downstream_gene_variant |
| rs2812773  | A  | G  | -1.04 | 0.39 | 0.39 | 0.0075  | <i>EYS</i>     | intron_variant          |
| rs3138137  | C  | A  | -1.42 | 0.53 | 0.29 | 0.0077  | <i>RDH5</i>    | intron_variant          |
| rs12898728 | T  | C  | 1.38  | 0.52 | 3.30 | 0.0081  | <i>NR2E3</i>   | downstream_gene_variant |
| rs1886698  | G  | A  | -1.20 | 0.46 | 0.37 | 0.0087  | <i>CDH3</i>    | intron_variant          |
| rs12661004 | A  | G  | -1.21 | 0.46 | 0.35 | 0.0091  | <i>PRDM13</i>  | upstream_gene_variant   |
| rs2272854  | C  | G  | 1.19  | 0.46 | 2.85 | 0.0096  | <i>TUBGCP6</i> | intron_variant          |

- [1] Resnikoff S, Pascolini D, Mariotti SP, et al. Global magnitude of visual impairment caused by uncorrected refractive errors in 2004. *Bulletin of the World Health Organization*. 2008;86(1):63-70
- [2] WILLIAMS K M, VERHOEVEN V J, CUMBERLAND P, et al. Prevalence of refractive error in Europe: the European Eye Epidemiology (E(3)) Consortium [J]. *European journal of epidemiology*, 2015, 30(4): 305-15.
- [3] WILLIAMS K M, BERTELSEN G, CUMBERLAND P, et al. Increasing Prevalence of Myopia in Europe and the Impact of Education [J]. *Ophthalmology*, 2015, 122(7): 1489- 97.
- [4] VITALE S, SPERDUTO R D, FERRIS F L, et al. Increased prevalence of myopia in the United States between 1971-1972 and 1999-2004 [J]. *Archives of ophthalmology*, 2009, 127(12): 1632-9
- [5] PAN C W, DIRANI M, CHENG C Y, et al. The age-specific prevalence of myopia in Asia: a meta-analysis [J]. *Optometry and vision science : official publication of the American Academy of Optometry*, 2015, 92(3): 258-66.
- [6] FOSTER P J, JIANG Y. Epidemiology of myopia [J]. *Eye*, 2014, 28(2): 202-8
- [7] MORGAN I G, FRENCH A N, ASHBY R S, et al. The epidemics of myopia: Aetiology and prevention [J]. *Progress in retinal and eye research*, 2018, 62: 134-49
- [8] WONG Y L, SAW S M. Epidemiology of Pathologic Myopia in Asia and Worldwide [J]. *Asia-Pacific journal of ophthalmology*, 2016, 5(6): 394-402.
- [9] Wong TY, Ferreira A, Hughes R, et al. Epidemiology and disease burden of pathologic myopia and myopic choroidal neovascularization: an evidence-based systematic review. *Am J Ophthalmol* 2014;157:9-25.e12
- [10] Walline JJ, Lindsley K, Vedula SS, et al. Interventions to slow progression of myopia in children. *Cochrane Database Syst Rev* 2011;12:CD004916.
- [11] Huang J, Wen D, Wang Q, et al. Efficacy comparison of 16 interventions for myopia control in children. *Ophthalmology* 2016;123:697–708.
- [12] Charman WN, Mountford J, Atchison DA, et al. Peripheral refraction in orthokeratology patients. *Optom Vis Sci* 2006;83:641–648.
- [13] Cho P, Cheung SW, Edwards M, et al. The longitudinal orthokeratology research in children (LORIC) in Hong Kong: A pilot study on refractive changes and myopic control.
- [14] Kakita T, Hiraoka T, Oshika T. Influence of overnight orthokeratology on axial elongation in childhood myopia. *Invest Ophthalmol Vis Sci* 2011;52: 2170–2174.
- [15] Cho P, Cheung SW. Retardation of myopia in orthokeratology (ROMIO) study: A 2-year randomized clinical trial. *Invest Ophthalmol Vis Sci* 2012; 53:7077–7085.
- [16] Hiraoka T, Kakita T, Okamoto F, et al. Long-term effect of overnight orthokeratology on axial length elongation in childhood myopia: A 5-year follow-up study. *Invest Ophthalmol Vis Sci* 2012;53:3913–3919.
- [17] Qi Y, Liu L, Li Y, Zhang F. Factors associated with faster axial elongation after orthokeratology treatment. *BMC Ophthalmol*. 2022 Feb 8;22(1):62.
- [18] Lam, A.K.C., Hon, Y., Leung, S.Y.Y. et al. Association between long-term orthokeratology responses and corneal biomechanics. *Sci Rep* 9, 12566 (2019).
- [19] Chen R, Yu J, Lipson M, Cheema AA, Chen Y, Lian H, Huang J, McAlinden C. Comparison of four different orthokeratology lenses in controlling myopia progression. *Cont Lens Anterior Eye*. 2020 Feb;43(1):78-83.
- [20] Kendig KI et al. Sentieon DNaseq Variant Calling Workflow Demonstrates Strong Computational Performance and Accuracy. *Front Genet*. 2019 Aug 20;10:736.
- [21] Heng Li et al. Fast and accurate short read alignment with Burrows–Wheeler transform, *Bioinformatics*, Volume 25, Issue 14, July 2009, Pages 1754–1760
- [22] Purcell S et al. PLINK: a tool set for whole-genome association and population-based linkage analyses. *Am J*

Hum Genet. 2007 Sep;81(3):559-75.

[23] Genomes Project, C., et al., A global reference for human genetic variation. *Nature*, 2015. 526(7571): p. 68-74.

[24] McLaren, W., Gil, L., Hunt, S.E. et al. The Ensembl Variant Effect Predictor. *Genome Biol* 17, 122 (2016).

[25] Karczewski KJ, et al. The mutational constraint spectrum quantified from variation in 141,456 humans. *Nature* 581, 434-443 (2020).

[26] Adzhubei IA, et al. A method and server for predicting damaging missense mutations. *Nature methods* 7, 248-249 (2010).

[27] Ng PC, Henikoff S. SIFT: Predicting amino acid changes that affect protein function. *Nucleic acids research* 31, 3812-3814 (2003).

[28] Rentzsch P, Witten D, Cooper GM, Shendure J, Kircher M. CADD: predicting the deleteriousness of variants throughout the human genome. *Nucleic acids research* 47, D886-D894 (2019).

[29] Jaganathan K, et al. Predicting splicing from primary sequence with deep learning. *Cell* 176, 535-548. e524 (2019).

[30] RetNet Database, <https://retnet.org/>, updated in April 16, 2024

[31] Cao, Y., Li, L., Xu, M. et al. The ChinaMAP analytics of deep whole genome sequences in 10,588 individuals. *Cell Res* 30, 717–731 (2020).

[32] Wu MC, Lee S, Cai T, Li Y, Boehnke M, Lin X. Rare-variant association testing for sequencing data with the sequence kernel association test. *Am J Hum Genet.* 2011 Jul 15;89(1):82-93.

[33] Lee S, Emond MJ, Bamshad MJ, Barnes KC, Rieder MJ, Nickerson DA; NHLBI GO Exome Sequencing Project—ESP Lung Project Team; Christiani DC, Wurfel MM, Lin X. Optimal unified approach for rare-variant association testing with application to small-sample case-control whole-exome sequencing studies. *Am J Hum Genet.* 2012 Aug 10;91(2):224-37.

[34] de Leeuw CA, Mooij JM, Heskes T, Posthuma D. MAGMA: generalized gene-set analysis of GWAS data. *PLoS Comput Biol.* 2015 Apr 17;11(4):e1004219.

[35] Zhou W, Nielsen JB, Fritsche LG, Dey R, Gabrielsen ME, Wolford BN, LeFaive J, VandeHaar P, Gagliano SA, Gifford A, Bastarache LA, Wei WQ, Denny JC, Lin M, Hveem K, Kang HM, Abecasis GR, Willer CJ, Lee S. Efficiently controlling for case-control imbalance and sample relatedness in large-scale genetic association studies. *Nat Genet.* 2018 Sep;50(9):1335-1341.

[36] Jiang L, Zheng Z, Qi T, Kemper KE, Wray NR, Visscher PM, Yang J. A resource-efficient tool for mixed model association analysis of large-scale data. *Nat Genet.* 2019 Dec;51(12):1749-1755.

[37] Yang J, Lee SH, Goddard ME, Visscher PM. GCTA: a tool for genome-wide complex trait analysis. *The American Journal of Human Genetics* 88, 76-82 (2011).

[38] Kang HM, et al. Variance component model to account for sample structure in genome-wide association studies. *Nature genetics* 42, 348-354 (2010).

[39] Connie Chen, Sin Wan Cheung, Pauline Cho; Myopia Control Using Toric orthokeratology (TO-SEE Study). *Invest. Ophthalmol. Vis. Sci.* 2013;54(10):6510-6517.

[40] Lee EJ, Lim DH, Chung TY, Hyun J, Han J. Association of Axial Length Growth and Topographic Change in Orthokeratology. *Eye Contact Lens.* 2018 Sep;44(5):292-298.

[41] Zhong Y, Chen Z, Xue F, Miao H, Zhou X. Central and Peripheral Corneal Power Change in Myopic orthokeratology and Its Relationship With 2-Year Axial Length Change. *Invest Ophthalmol Vis Sci.* 2015 Jul;56(8):4514-9.



- [42] Santodomingo-Rubido J, Villa-Collar C, Gilmartin B, Gutiérrez-Ortega R. Factors preventing myopia progression with orthokeratology orrection. *Optom Vis Sci*. 2013 Nov;90(11):1225-36.
- [43] Saw SM, Nieto FJ, Katz J, Schein OD, Levy B, Chew SJ. Factors related to the progression of myopia in Singaporean children. *Optom Vis Sci*. 2000 Oct;77(10):549-54.
- [44] Hyman L, Gwiazda J, Hussein M, Norton TT, Wang Y, Marsh-Tootle W, Everett D. Relationship of age, sex, and ethnicity with myopia progression and axial elongation in the correction of myopia evaluation trial. *Arch Ophthalmol*. 2005 Jul;123(7):977-87.
- [45] Donovan L, Sankaridurg P, Ho A, Naduvilath T, Smith EL 3rd, Holden BA. Myopia progression rates in urban children wearing single-vision spectacles. *Optom Vis Sci*. 2012 Jan;89(1):27-32.
- [46] Hu Y, Ding X, Guo X, Chen Y, Zhang J, He M. Association of Age at Myopia Onset With Risk of High Myopia in Adulthood in a 12-Year Follow-up of a Chinese Cohort. *JAMA Ophthalmol*. 2020;138(11):1129–1134.
- [47] Yu X, Yuan J, Chen ZJ, et al. Whole-Exome Sequencing Among School-Aged Children With High Myopia. *JAMA Netw Open*. 2023;6(12):e2345821.
- [48] Sun W, Huang L, Xu Y, Xiao X, Li S, Jia X, Gao B, Wang P, Guo X, Zhang Q. Exome Sequencing on 298 Proband With Early-Onset High Myopia: Approximately One-Fourth Show Potential Pathogenic Mutations in RetNet Genes. *Invest Ophthalmol Vis Sci*. 2015 Dec;56(13):8365-72.
- [49] Zhou L, Xiao X, Li S, Jia X, Zhang Q. Frequent mutations of RetNet genes in eoHM: Further confirmation in 325 probands and comparison with late-onset high myopia based on exome sequencing. *Exp Eye Res*. 2018 Jun;171:76-91.
- [50] Wang B, Naidu RK, Qu X. Factors related to axial length elongation and myopia progression in orthokeratology practice. *PLoS One*. 2017 Apr 18;12(4):e0175913.
- [51] Fu AC, Chen XL, Lv Y, Wang SL, Shang LN, Li XH, Zhu Y. Higher spherical equivalent refractive errors is associated with slower axial elongation wearing orthokeratology. *Cont Lens Anterior Eye*. 2016 Feb;39(1):62-6.
- [52] Lin W, Li N, Lu K, Li Z, Zhuo X, Wei R. The relationship between baseline axial length and axial elongation in myopic children undergoing orthokeratology. *Ophthalmic Physiol Opt*. 2023 Jan;43(1):122-131.
- [53] akobsen TM, Møller F. Control of myopia using orthokeratology lenses in Scandinavian children aged 6 to 12 years. Eighteen-month data from the Danish Randomized Study: Clinical study Of Near-sightedness; TRreatment with orthokeratology Lenses (CONTROL study). *Acta Ophthalmol*. 2022 Mar;100(2):175-182.
- [54] Kinoshita N, Konno Y, Hamada N, Kanda Y, Shimmura-Tomita M, Kaburaki T, et al. Efficacy of combined orthokeratology and 0.01% atropine solution for slowing axial elongation in children with myopia: a 2-year randomised trial. *Sci Rep*. 2020 Jul;10(1):12750.
- [55] Tan Q, Lk Ng A, Choy BN, Cheng GP, Woo VC, Cho P. One-year results of 0.01% atropine with orthokeratology (AOK) study: a randomised clinical trial. *Ophthalmic Physiol Opt*. 2020;40:557–66.
- [56] Wang S, Wang J, Wang N. Combined orthokeratology with Atropine for Children with Myopia: A Meta-Analysis. *Ophthalmic Res*. 2021;64(5):723-731.
- [57] Kang P, et al. Effect of single vision soft contact lenses on peripheral refraction. *Optom. Vis*.
- [58] Shen J, Clark CA, Soni PS, Thibos LN. Peripheral refraction with and without contact lens correction. *Optom. Vis. Sci*. 2010;87:642–655.
- [59] Liu Y, Wildsoet C. The effective add inherent in 2-zone negative lenses inhibits eye growth in myopic young chicks. *Investig. Ophthalmol. Vis. Sci*. 2012;53:5085–5093.
- [60] Troilo D, et al. IMI—Report on experimental models of emmetropization and myopia. *Investig. Ophthalmol. Vis. Sci*. 2019;60:M31–M88.

- [61] Smith EL., 3rd Prentice Award Lecture 2010: A case for peripheral optical treatment strategies for myopia. *Optom. Vis. Sci.* 2011 Sep;88(9):1029-44.
- [62] Wenmin Sun, Li Huang, Yan Xu, Xueshan Xiao, Shiqiang Li, Xiaoyun Jia, Bei Gao, Panfeng Wang, Xiangming Guo, Qingjiong Zhang; Exome Sequencing on 298 Proband With Early-Onset High Myopia: Approximately One-Fourth Show Potential Pathogenic Mutations in RetNet Genes. *Invest. Ophthalmol. Vis. Sci.* 2015;56(13):8365-8372.
- [63] Zhou L, Xiao X, Li S, Jia X, Zhang Q. Frequent mutations of RetNet genes in eoHM: Further confirmation in 325 probands and comparison with late-onset high myopia based on exome sequencing. *Exp Eye Res.* 2018 Jun;171:76-91.
- [64] Jiang D, Li J, Xiao X, et al. Detection of mutations in LRPAP1, CTSH, LEPREL1, ZNF644, SLC39A5, and SCO2 in 298 families with early-onset high myopia by exome sequencing. *Invest Ophthalmol Vis Sci.* 2015; 56: 339–345.
- [65] Zeitz C., Robson A.G., Audo I. Congenital stationary night blindness: an analysis and update of genotype-phenotype correlations and pathogenic mechanisms. *Prog. Retin. Eye Res.* 2015;45:58–110.
- [66] Mechaussier, S., Almoallem, B., Zeitz, C., Schil, K. V., Jeddawi, L., Dorpe, J. V., Rey, A. D., Condroyer, C., Pelle, O., Polak, M., Boddaert, N., Bahi-Buisson, N., Cavallin, M., Bacquet, L., Mouallem-Bézière, A., Zambrowski, O., Sahel, J. A., Audo, I., Kaplan, J., . . . Perrault, I. (2020). Loss of Function of RIMS2 Causes a Syndromic Congenital Cone-Rod Synaptic Disease with Neurodevelopmental and Pancreatic Involvement. *American Journal of Human Genetics*, 106(6), 859-871.
- [67] Vallespin E, Avila-Fernandez A, Almoguera B, Velez-Monsalve C, Cantalapiedra D, Garcia-Hoyos M, Riveiro-Alvarez R, Aguirre-Lamban J, Bustamante-Aragones A, Trujillo-Tiebas MJ, Ayuso C. Novel human pathological mutations. Gene symbol: LCA5. Disease: Leber congenital amaurosis. *Hum Genet.* 2010b;127(4):487.
- [68] den Hollander AI, Koenekoop RK, Mohamed MD, Arts HH, Boldt K, Towns KV, Sedmak T, Beer M, Nagel-Wolfrum K, McKibbin M, Dharmaraj S, Lopez I, et al. Mutations in LCA5, encoding the ciliary protein lebercilin, cause Leber congenital amaurosis. *Nat Genet.* 2007;39(7):889–895.
- [69] Boldt K, Mans DA, Won J, van Reeuwijk J, Vogt A, Kinkl N, Letteboer SJ, Hicks WL, Hurd RE, Naggert JK, Texier Y, den Hollander AI, et al. Disruption of intraflagellar protein transport in photoreceptor cilia causes Leber congenital amaurosis in humans and mice. *J Clin Invest.* 2011;121(6):2169–2180.
- [70] Jin ZB, Huang XF, Lv JN, Xiang L, Li DQ, Chen J, Huang C, Wu J, Lu F, Qu J. SLC7A14 linked to autosomal recessive retinitis pigmentosa. *Nat Commun.* 2014 Mar 27;5:3517.
- [71] Omori Y, Zhao C, Saras A, et al. Elipsa is an early determinant of ciliogenesis that links the IFT particle to membrane-associated small GTPase Rab8. *Nat Cell Biol* 2008;10:437–444.
- [72] Lee, C., Wallingford, J. B. & Gross, J. M. Cluap1 is essential for ciliogenesis and photoreceptor maintenance in the vertebrate eye. *Invest. Ophthalmol. Vis. Sci.* 55, 4585–4592 (2014).

**Additional file 1. Standard quality controls of 60 WGS samples.** Boxplot of (a) sample mean depth, (b) sample mean genotype quality, (c) sample mean call rate for 60 samples. (d) Principal component analysis plot comparing 60 individuals with East Asian populations from the 1000 Genomes Project.

**Additional file 2. Burden test of different type of variant.** Burden analysis used logistic regression in (a) all type of variants (b) common variants and (c) rare variants between cases and controls.

a

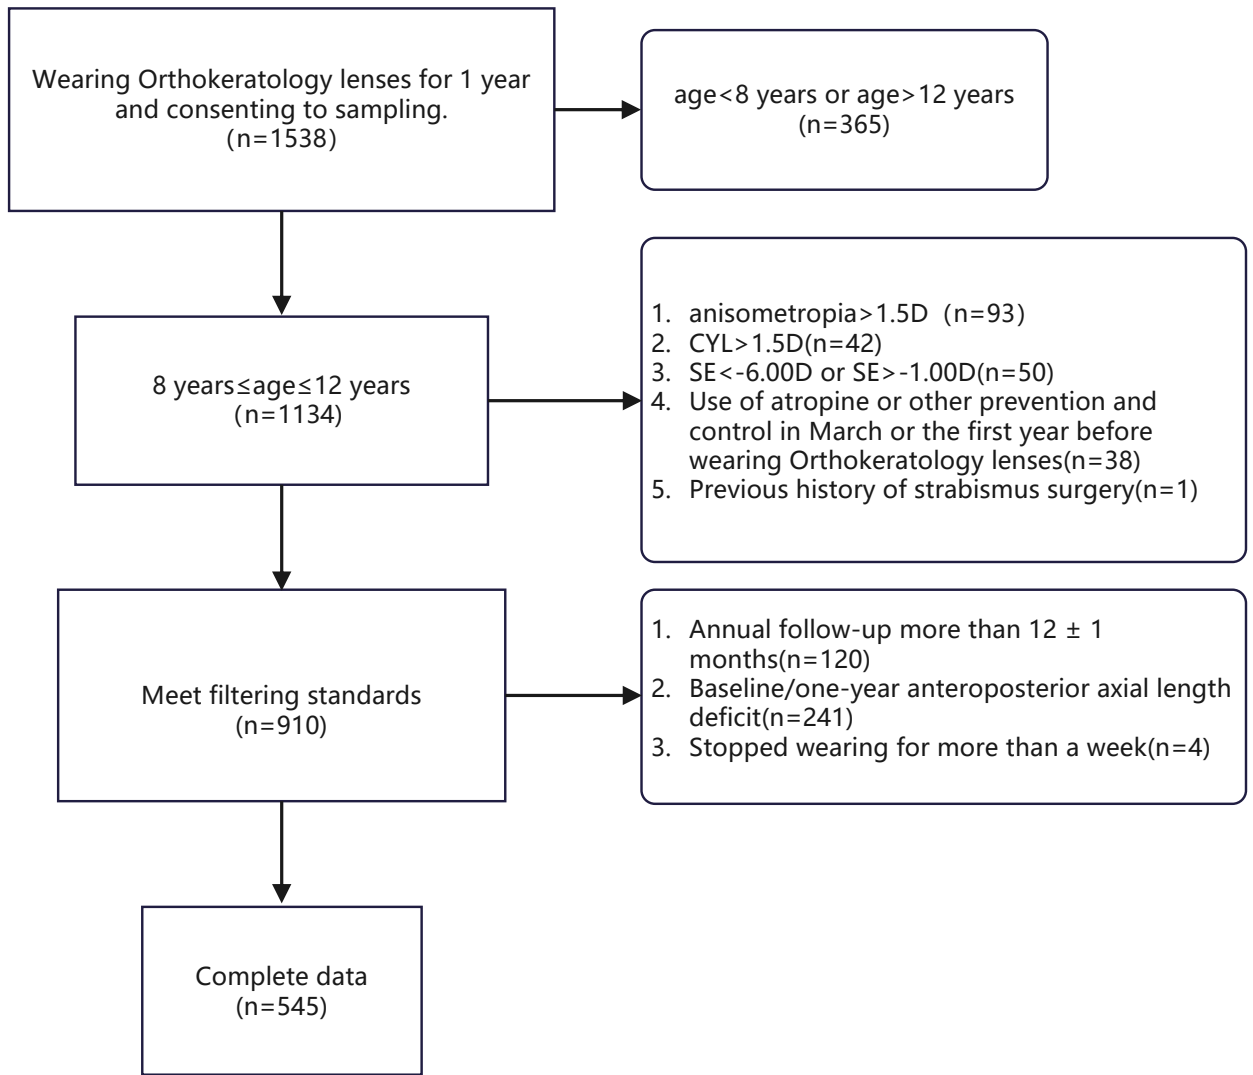

b

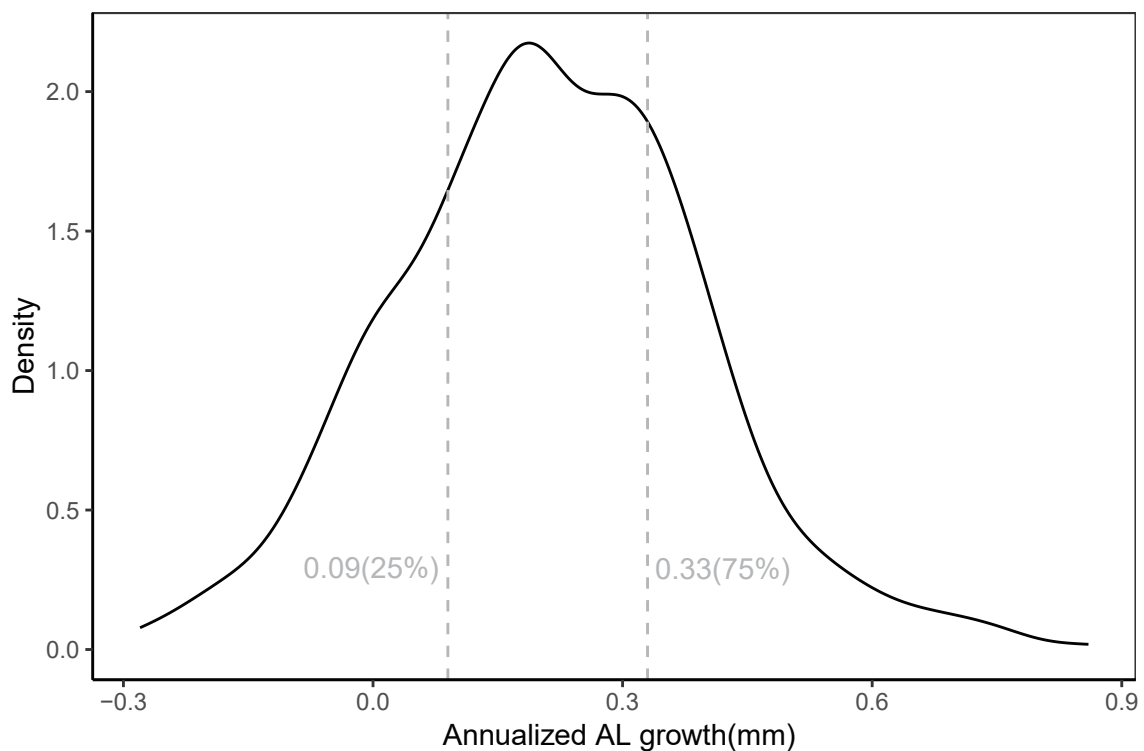

**a**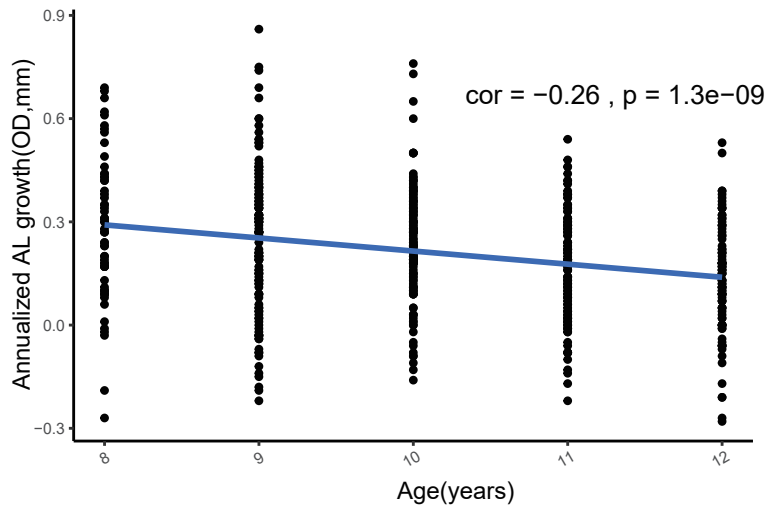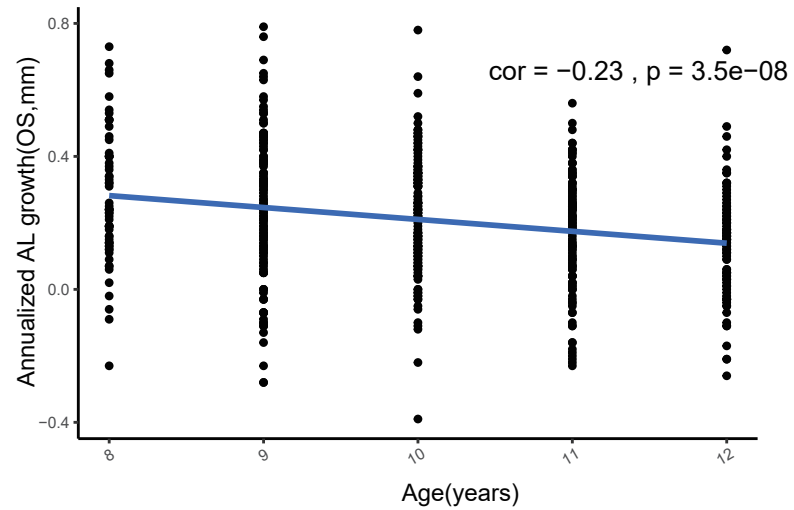**b**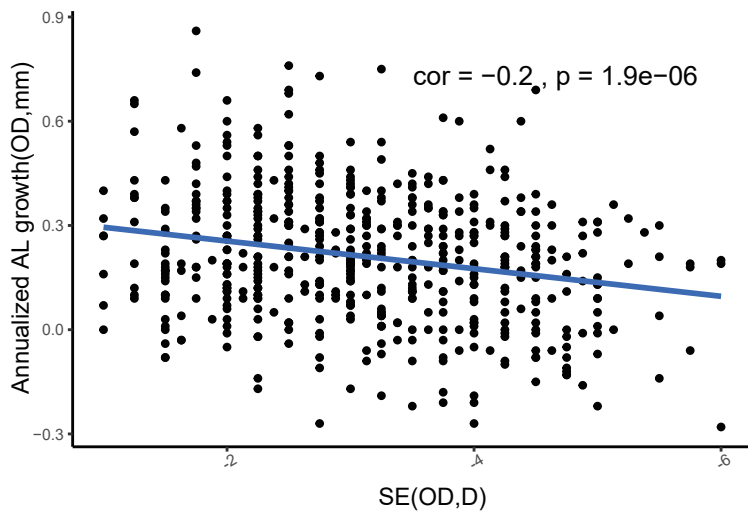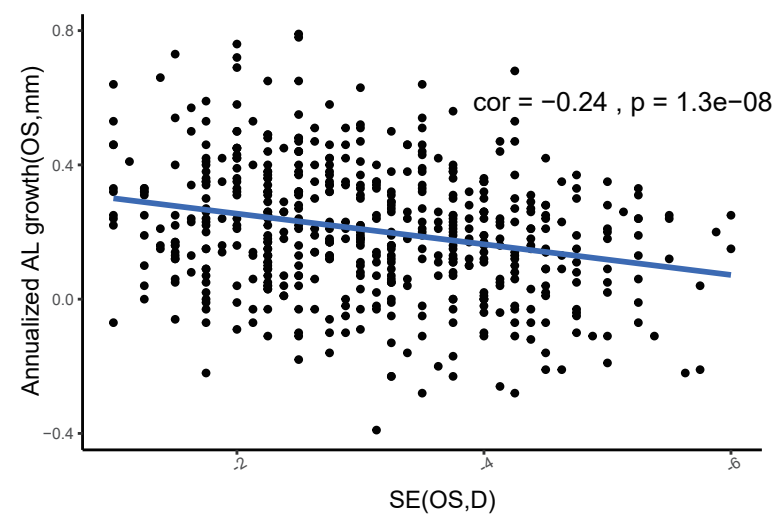**c**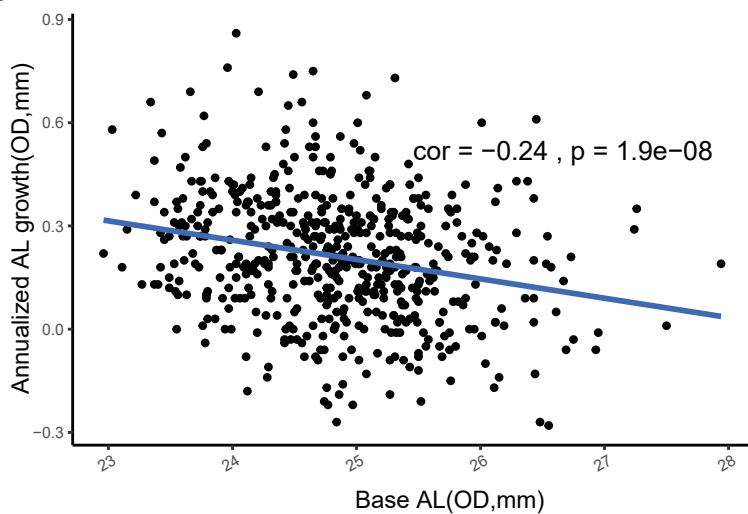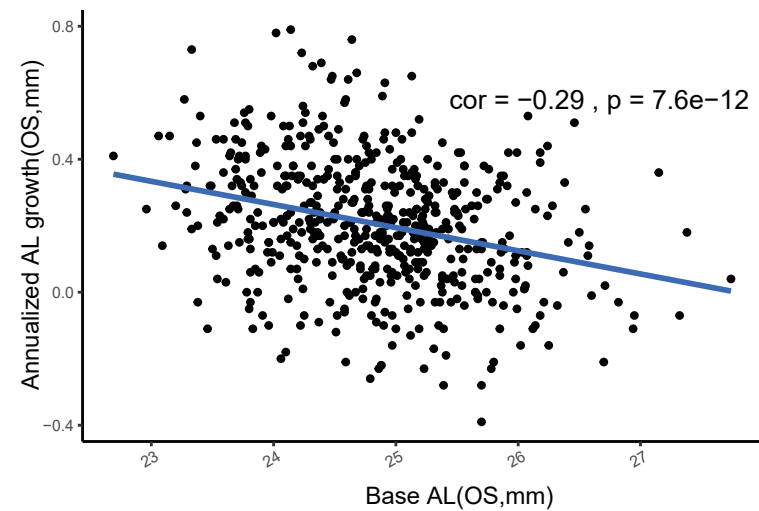

**a**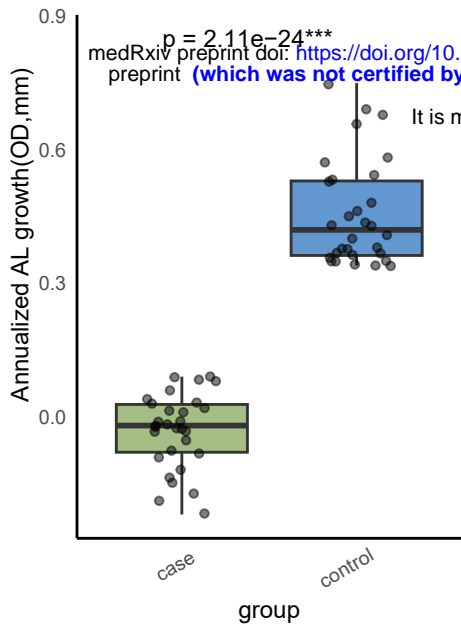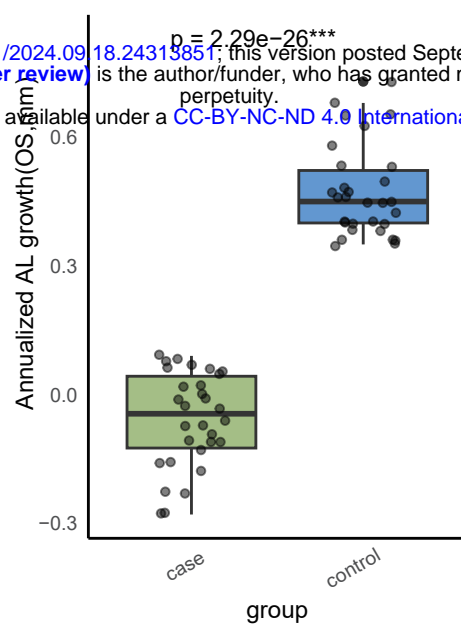**b**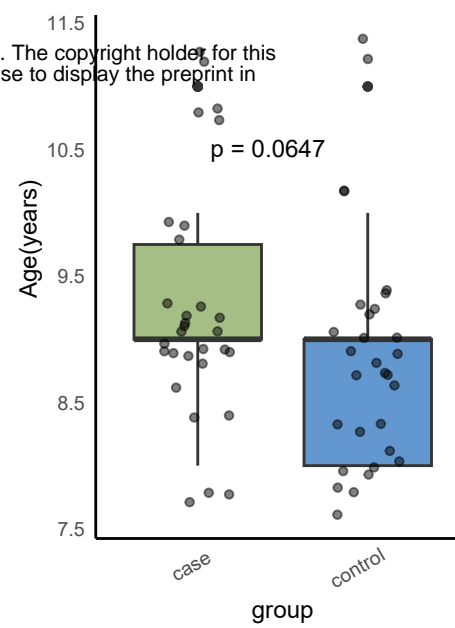**c**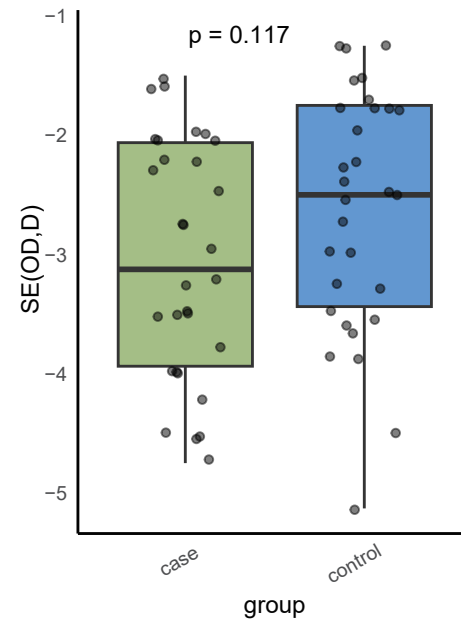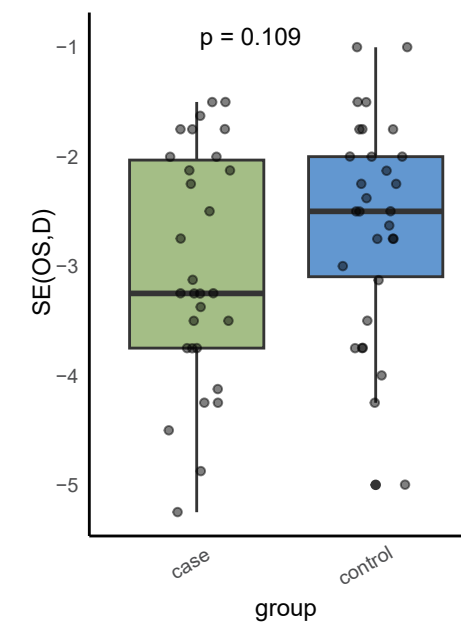**d**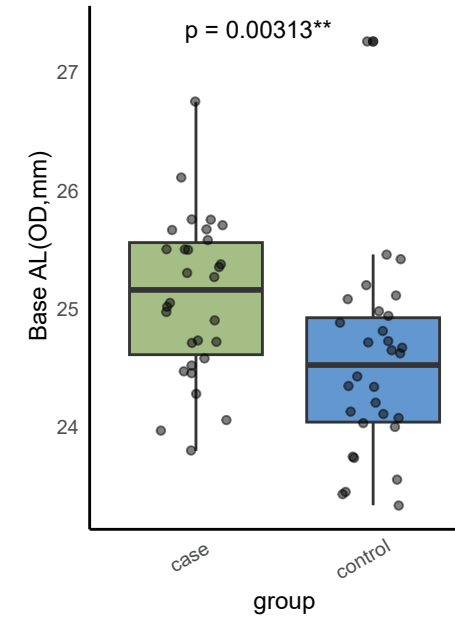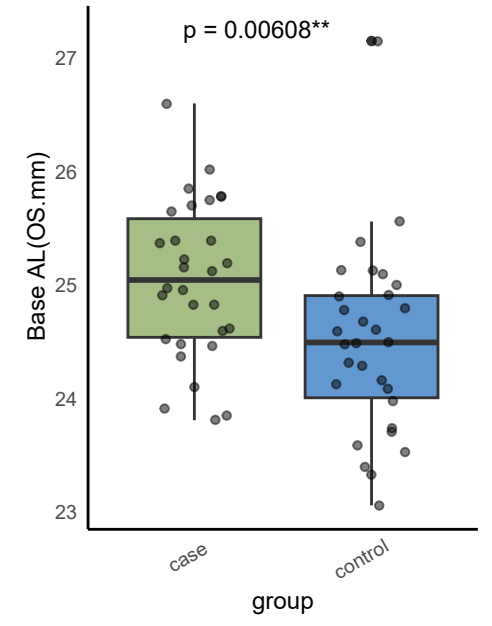**e**

### Enrichment in the effectiveness of Orthokeratology

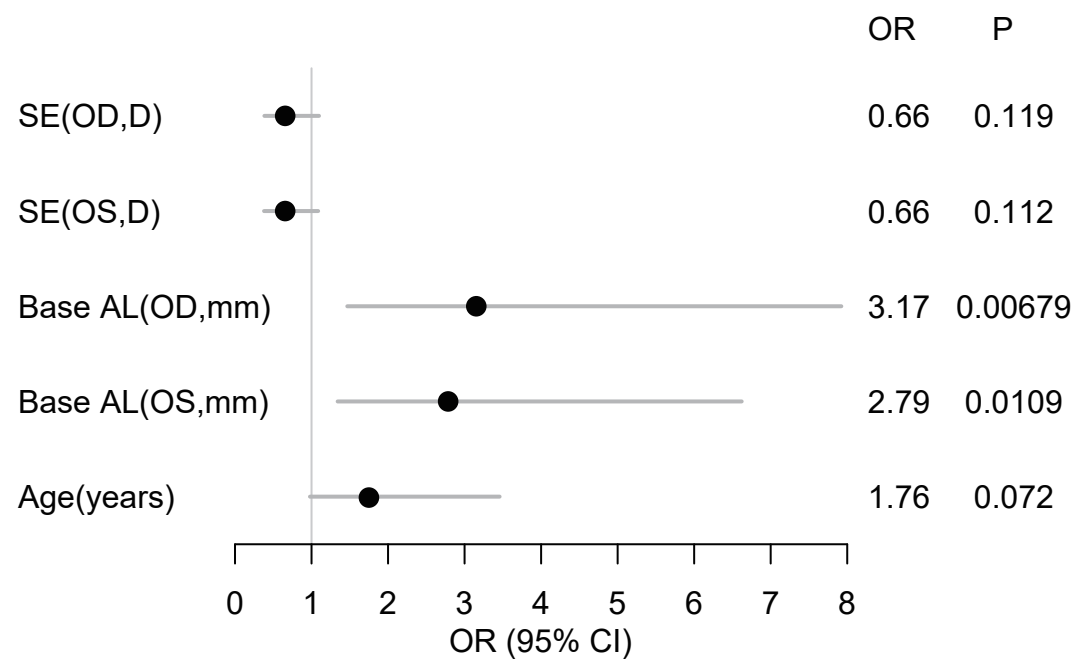

**a****Retnet genes-common**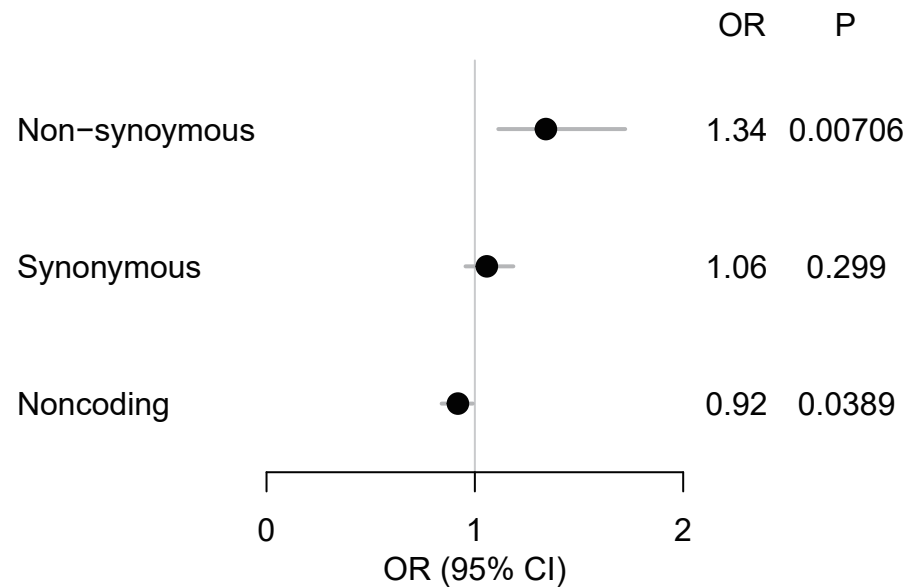**b****Retnet genes-rare**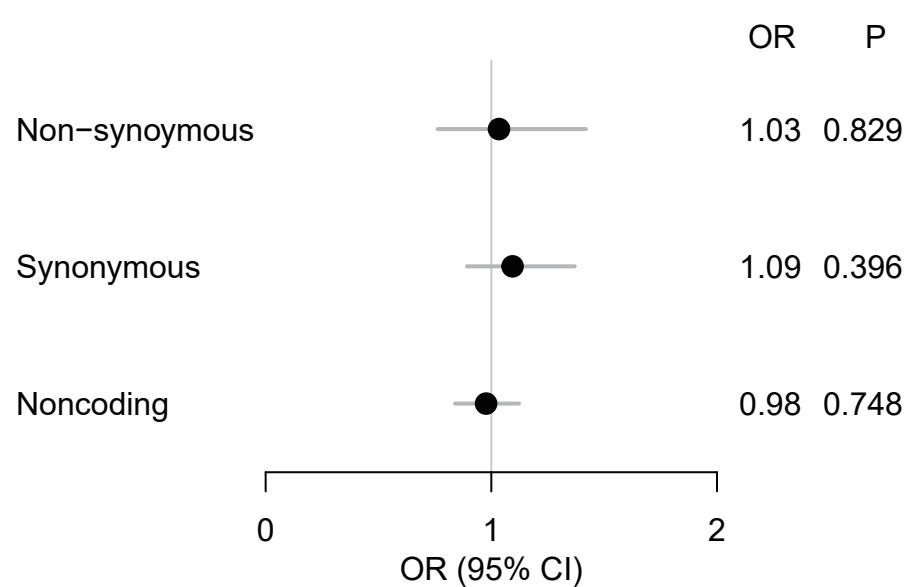

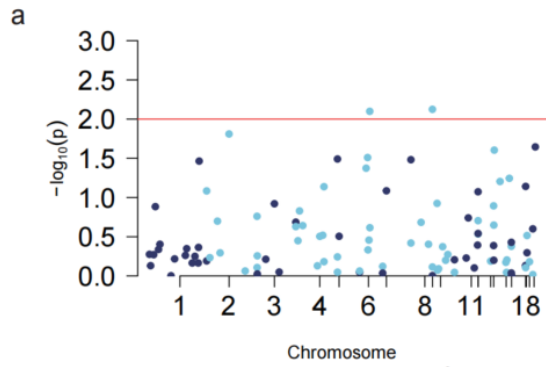

**b**

| gene         | variant num | case      | control  | OR   | P_logistic |
|--------------|-------------|-----------|----------|------|------------|
| <i>RIMS2</i> | 1           | 4(13.3%)  | 9(30%)   | 0.01 | 0.0075     |
| <i>LCA5</i>  | 2           | 14(46.7%) | 5(16.7%) | 6.96 | 0.0080     |

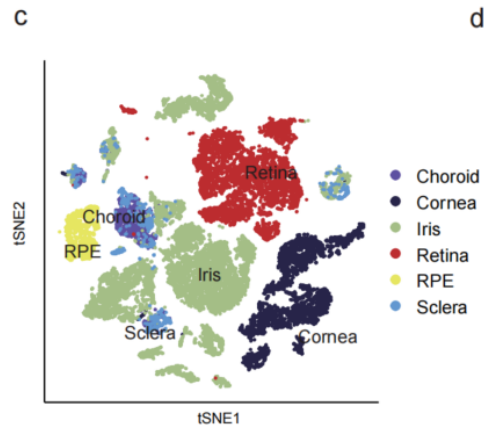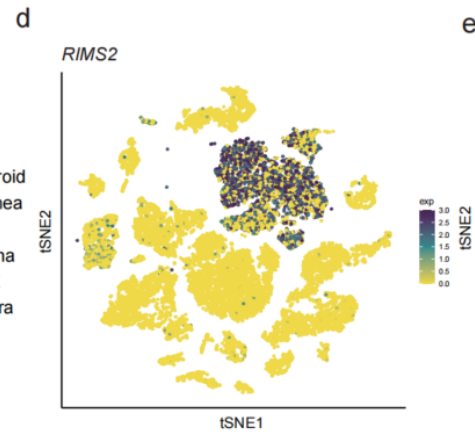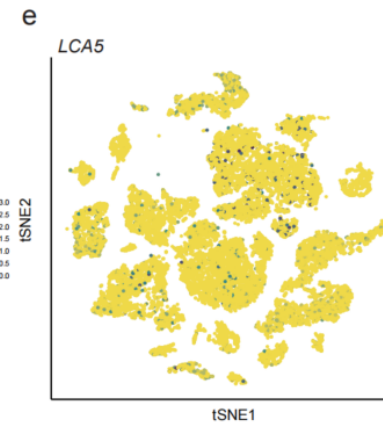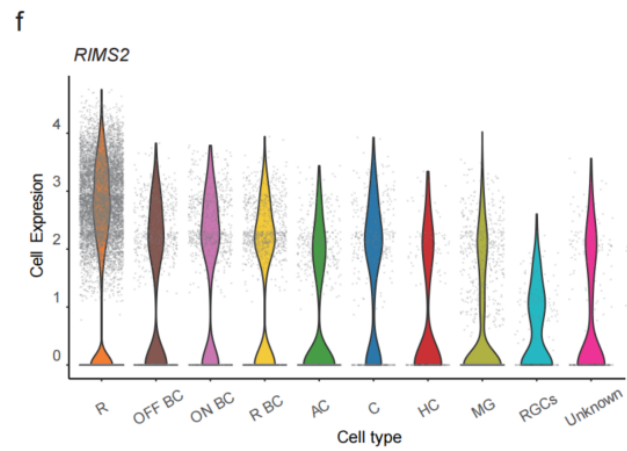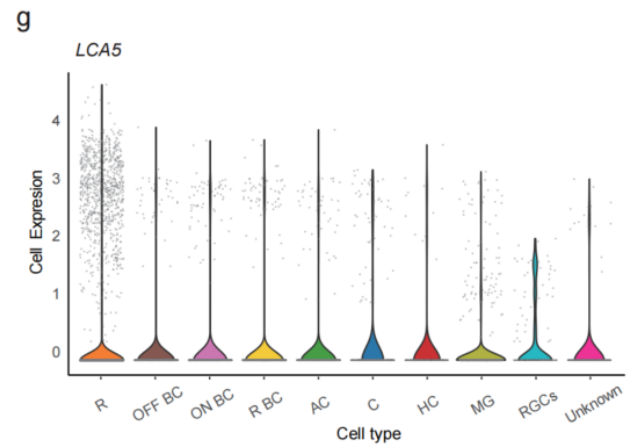



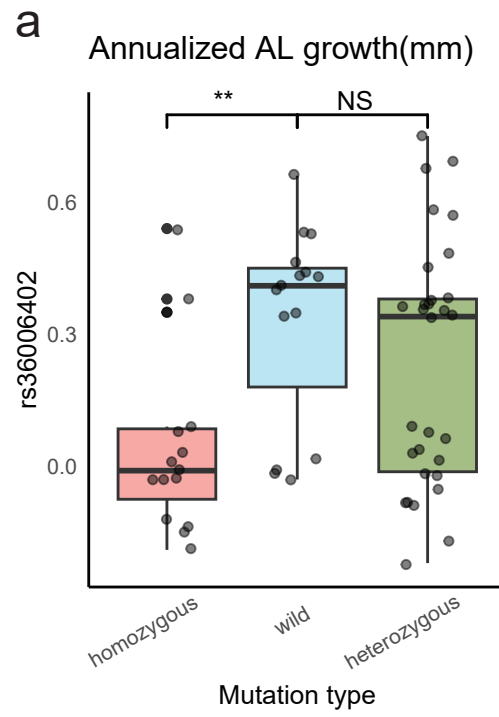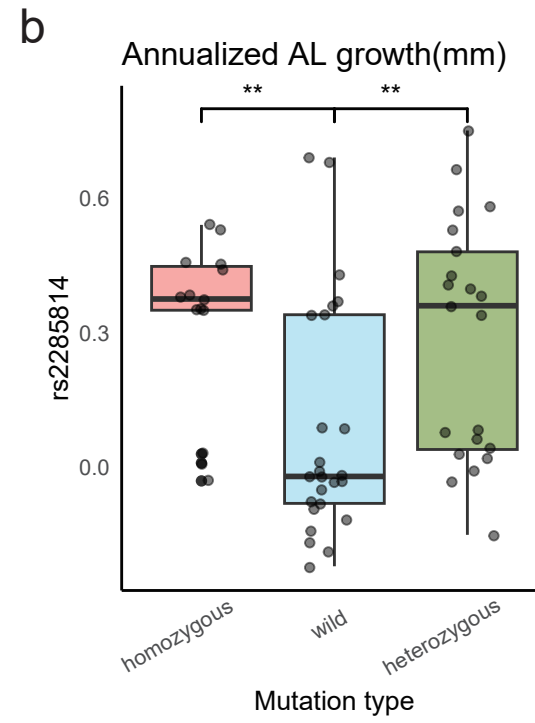

Source: https://medrxiv.org/content/10.1101/2024.09.18.24313851v1.full.pdf
